# Supplementary material for: Biogeography of Leptospira in wild animal communities inhabiting the insular ecosystem of the western Indian Ocean islands and neighboring Africa
Source: PubMed Central journal article supplement (PMC5883017; doi:10.1038/s41426-018-0059-4), 2018-04-04
Supplement: 41426_2018_59_MOESM1_ESM.pdf [file 41426_2018_59_MOESM1_ESM.pdf]

# **Biogeography of *Leptospira* in wild animal communities inhabiting the insular ecosystem of the western Indian Ocean islands and neighboring Africa**

Dietrich *et al.* – Supporting Information

## **Text S1. Animal capture methodology**

Animals were captured, manipulated and dispatched in accordance with guidelines accepted by the scientific community and professional mammalogists for the handling of wild mammals <sup>1</sup>. For rodents, tenrecs and shrews, animals were trapped using pitfall buckets and baited-live traps put in place during the night and inspected the following morning. Only baited-live traps were used for sampling on La Réunion and in the Seychelles.

Bats were captured at dusk or during the night using mist nets or harp traps placed in proximity to cave entrances, across presumed flight pathways, or near water sources. On several occasions, a butterfly net was used to obtain bats inside day roost sites.

Captured animals were identified based on different external and cranio-dental characters or using genetic barcoding <sup>2</sup>. Euthanasia of terrestrial small mammals was performed using cervical dislocation, and for bats with the injection of ketamine or inhalation of isoflurane, followed by cardiac puncture. Dissections were performed using sterile utensils. All tissue samples were immediately conserved in liquid nitrogen, and stored at -80°C after transportation to the laboratory.

**Table S1. List and details of samples used in this study.** A black cross indicates failed PCR.

| Sample ID | Museum or field collection number | Island/Country | Location              | Host family or sub-family | Host species                     | Year | icdA       | secY                        | lipL41                      | adk                         | rrs2                        | Included in the multilocus analysis |
|-----------|-----------------------------------|----------------|-----------------------|---------------------------|----------------------------------|------|------------|-----------------------------|-----------------------------|-----------------------------|-----------------------------|-------------------------------------|
| 6         | FMNH 220036                       | Comoros        | Fassi (Grande Comore) | Pteropodidae              | <i>Rousettus obliviosus</i>      | 2011 | X          | X                           | X                           | X                           | This study                  | NO                                  |
| 30        | FMNH 220056                       | Comoros        | Bazimini (Anjouan)    | Miniopteridae             | <i>Miniopterus griveaudi</i>     | 2011 | This study | This study                  | This study                  | This study                  | This study                  | YES                                 |
| 16704     | FMNH 220030                       | Comoros        | Fassi (Grande Comore) | Pteropodidae              | <i>Rousettus obliviosus</i>      | 2011 | This study | This study                  | This study                  | This study                  | This study                  | YES                                 |
| 122       | FMNH 209278                       | Madagascar     | Toliara               | Miniopteridae             | <i>Miniopterus mahafaliensis</i> | 2009 | This study | Dietrich <i>et al.</i> 2014 | Dietrich <i>et al.</i> 2014 | Dietrich <i>et al.</i> 2014 | Dietrich <i>et al.</i> 2014 | YES                                 |
| 135       | FMNH 209260                       | Madagascar     | Toliara               | Rhinonycteridae           | <i>Triaenops menamena</i>        | 2009 | This study | This study                  | This study                  | This study                  | This study                  | YES                                 |
| 136       | UADBA 43229                       | Madagascar     | Toliara               | Miniopteridae             | <i>Miniopterus griffithsi</i>    | 2009 | This study | Dietrich <i>et al.</i> 2014 | Dietrich <i>et al.</i> 2014 | Dietrich <i>et al.</i> 2014 | Dietrich <i>et al.</i> 2014 | YES                                 |
| 265       | FMNH 209265                       | Madagascar     | Toliara               | Molossidae                | <i>Otomops madagascariensis</i>  | 2009 | This study | This study                  | This study                  | This study                  | This study                  | YES                                 |
| 266       | FMNH 209258                       | Madagascar     | Toliara               | Rhinonycteridae           | <i>Triaenops menamena</i>        | 2009 | X          | This study                  | X                           | X                           | This study                  | NO                                  |
| 271       | FMNH 209276                       | Madagascar     | Toliara               | Miniopteridae             | <i>Miniopterus mahafaliensis</i> | 2009 | This study | Dietrich <i>et al.</i> 2014 | Dietrich <i>et al.</i> 2014 | Dietrich <i>et al.</i> 2014 | Dietrich <i>et al.</i> 2014 | YES                                 |
| 272       | UADBA SMG-16886                   | Madagascar     | Toliara               | Vespertilionidae          | <i>Myotis goudoti</i>            | 2009 | This study | Dietrich <i>et al.</i> 2014 | Dietrich <i>et al.</i> 2014 | Dietrich <i>et al.</i> 2014 | Dietrich <i>et al.</i> 2014 | YES                                 |
| 575       | UADBA 30869                       | Madagascar     | Ankazomivady          | Tenrecidae                | <i>Microgale dobsoni</i>         | 2010 | This study | Dietrich <i>et al.</i> 2014 | Dietrich <i>et al.</i> 2014 | Dietrich <i>et al.</i> 2014 | Dietrich <i>et al.</i> 2014 | YES                                 |
| 588       | UADBA 30289                       | Madagascar     | Ankazomivady          | Tenrecidae                | <i>Microgale majori</i>          | 2010 | This study | Dietrich <i>et al.</i> 2014 | Dietrich <i>et al.</i> 2014 | Dietrich <i>et al.</i> 2014 | Dietrich <i>et al.</i> 2014 | YES                                 |
| 590       | UADBA 30291                       | Madagascar     | Ankazomivady          | Tenrecidae                | <i>Microgale longicaudata</i>    | 2010 | This study | Dietrich <i>et al.</i> 2014 | Dietrich <i>et al.</i> 2014 | Dietrich <i>et al.</i> 2014 | Dietrich <i>et al.</i> 2014 | YES                                 |
| 597       | UADBA 30850                       | Madagascar     | Ankazomivady          | Tenrecidae                | <i>Hemicentetes nigriceps</i>    | 2010 | This study | Dietrich <i>et al.</i> 2014 | This study                  | This study                  | This study                  | YES                                 |
| 599       | UADBA 30296                       | Madagascar     | Ankazomivady          | Nesomyinae                | <i>Eliurus minor</i>             | 2010 | This study | Dietrich <i>et al.</i> 2014 | Dietrich <i>et al.</i> 2014 | Dietrich <i>et al.</i> 2014 | Dietrich <i>et al.</i> 2014 | YES                                 |
| 610       | UADBA 31054                       | Madagascar     | Ankazomivady          | Nesomyinae                | <i>Eliurus minor</i>             | 2010 | X          | X                           | X                           | X                           | This study                  | NO                                  |
| 620       | UADBA 31056                       | Madagascar     | Ankazomivady          | Nesomyinae                | <i>Eliurus minor</i>             | 2010 | This study | Dietrich <i>et al.</i> 2014 | Dietrich <i>et al.</i> 2014 | Dietrich <i>et al.</i> 2014 | Dietrich <i>et al.</i> 2014 | YES                                 |
| 623       | UADBA 31057                       | Madagascar     | Ankazomivady          | Nesomyinae                | <i>Eliurus minor</i>             | 2010 | This study | Dietrich <i>et al.</i> 2014 | Dietrich <i>et al.</i> 2014 | Dietrich <i>et al.</i> 2014 | Dietrich <i>et al.</i> 2014 | YES                                 |
| 624       | UADBA 31058                       | Madagascar     | Ankazomivady          | Nesomyinae                | <i>Eliurus minor</i>             | 2010 | X          | X                           | X                           | X                           | This study                  | NO                                  |
| 625       | UADBA 31059                       | Madagascar     | Ankazomivady          | Nesomyinae                | <i>Eliurus minor</i>             | 2010 | This study | Dietrich <i>et al.</i> 2014 | Dietrich <i>et al.</i> 2014 | Dietrich <i>et al.</i> 2014 | Dietrich <i>et al.</i> 2014 | YES                                 |

| Sample ID | Museum or field collection number | Island/Country | Location         | Host family or sub-family | Host species                     | Year | icdA       | secY                        | lipL41                      | adk                         | rrs2                        | Included in the multilocus analysis |
|-----------|-----------------------------------|----------------|------------------|---------------------------|----------------------------------|------|------------|-----------------------------|-----------------------------|-----------------------------|-----------------------------|-------------------------------------|
| 626       | UADBA 30859                       | Madagascar     | Ankazomivady     | Nesomyiinae               | <i>Eliurus minor</i>             | 2010 | This study | Dietrich <i>et al.</i> 2014 | Dietrich <i>et al.</i> 2014 | Dietrich <i>et al.</i> 2014 | Dietrich <i>et al.</i> 2014 | YES                                 |
| 628       | UADBA 30861                       | Madagascar     | Ankazomivady     | Nesomyiinae               | <i>Eliurus minor</i>             | 2010 | This study | Dietrich <i>et al.</i> 2014 | Dietrich <i>et al.</i> 2014 | Dietrich <i>et al.</i> 2014 | Dietrich <i>et al.</i> 2014 | YES                                 |
| 635       | UADBA 43253                       | Madagascar     | Fianarantsoa     | Miniopteridae             | <i>Miniopterus majori</i>        | 2010 | X          | Dietrich <i>et al.</i> 2014 | Dietrich <i>et al.</i> 2014 | Dietrich <i>et al.</i> 2014 | Dietrich <i>et al.</i> 2014 | NO                                  |
| 653       | UADBA 43265                       | Madagascar     | Fianarantsoa     | Miniopteridae             | <i>Miniopterus sororculus</i>    | 2010 | X          | Dietrich <i>et al.</i> 2014 | Dietrich <i>et al.</i> 2014 | Dietrich <i>et al.</i> 2014 | Dietrich <i>et al.</i> 2014 | NO                                  |
| 685       | FMNH 209271                       | Madagascar     | Toliara          | Miniopteridae             | <i>Miniopterus gleni</i>         | 2009 | This study | Dietrich <i>et al.</i> 2014 | Dietrich <i>et al.</i> 2014 | Dietrich <i>et al.</i> 2014 | Dietrich <i>et al.</i> 2014 | YES                                 |
| 692       | UADBA 43211                       | Madagascar     | Toliara          | Molossidae                | <i>Mormopterus jugularis</i>     | 2009 | X          | This study                  | X                           | X                           | This study                  | NO                                  |
| 693       | UADBA 43213                       | Madagascar     | Toliara          | Molossidae                | <i>Mormopterus jugularis</i>     | 2009 | This study | This study                  | This study                  | This study                  | This study                  | YES                                 |
| 696       | UADBA 43220                       | Madagascar     | Toliara          | Miniopteridae             | <i>Miniopterus mahafaliensis</i> | 2009 | This study | Dietrich <i>et al.</i> 2014 | Dietrich <i>et al.</i> 2014 | Dietrich <i>et al.</i> 2014 | Dietrich <i>et al.</i> 2014 | YES                                 |
| 700       | UADBA 43225                       | Madagascar     | Toliara          | Rhinonycteridae           | <i>Triaenops menamena</i>        | 2009 | X          | This study                  | X                           | X                           | This study                  | NO                                  |
| 701       | UADBA 43227                       | Madagascar     | Toliara          | Rhinonycteridae           | <i>Triaenops menamena</i>        | 2009 | This study | This study                  | This study                  | This study                  | This study                  | YES                                 |
| 702       | FMNH 209259                       | Madagascar     | Toliara          | Rhinonycteridae           | <i>Triaenops menamena</i>        | 2009 | This study | This study                  | This study                  | This study                  | This study                  | YES                                 |
| 770       | UADBA 31595                       | Madagascar     | Lakato           | Tenrecidae                | <i>Hemicentetes semispinosus</i> | 2011 | X          | Dietrich <i>et al.</i> 2014 | X                           | X                           | This study                  | NO                                  |
| 1309      | UADBA 50057                       | Madagascar     | Ankazomivady     | Tenrecidae                | <i>Microgale principula</i>      | 2011 | This study | Dietrich <i>et al.</i> 2014 | Dietrich <i>et al.</i> 2014 | Dietrich <i>et al.</i> 2014 | Dietrich <i>et al.</i> 2014 | YES                                 |
| 1310      | UADBA 32095                       | Madagascar     | Ankazomivady     | Tenrecidae                | <i>Microgale cowani</i>          | 2011 | X          | Dietrich <i>et al.</i> 2014 | X                           | X                           | This study                  | NO                                  |
| 1326      | UADBA 32057                       | Madagascar     | Ankazomivady     | Nesomyiinae               | <i>Eliurus minor</i>             | 2011 | This study | Dietrich <i>et al.</i> 2014 | Dietrich <i>et al.</i> 2014 | Dietrich <i>et al.</i> 2014 | Dietrich <i>et al.</i> 2014 | YES                                 |
| 1329      | UADBA 32062                       | Madagascar     | Ankazomivady     | Nesomyiinae               | <i>Eliurus minor</i>             | 2011 | This study | Dietrich <i>et al.</i> 2014 | Dietrich <i>et al.</i> 2014 | Dietrich <i>et al.</i> 2014 | Dietrich <i>et al.</i> 2014 | YES                                 |
| 1335      | UADBA 32122                       | Madagascar     | Ankazomivady     | Tenrecidae                | <i>Microgale majori</i>          | 2011 | This study | Dietrich <i>et al.</i> 2014 | Dietrich <i>et al.</i> 2014 | Dietrich <i>et al.</i> 2014 | Dietrich <i>et al.</i> 2014 | YES                                 |
| 1387      | UADBA 50028                       | Madagascar     | Ankazomivady     | Nesomyiinae               | <i>Eliurus minor</i>             | 2011 | This study | Dietrich <i>et al.</i> 2014 | Dietrich <i>et al.</i> 2014 | Dietrich <i>et al.</i> 2014 | Dietrich <i>et al.</i> 2014 | YES                                 |
| 1443      | UADBA 32399                       | Madagascar     | Ambovondramanesy | Pteropodidae              | <i>Pteropus rufus</i>            | 2012 | X          | X                           | X                           | X                           | This study                  | NO                                  |
| 1453      | UADBA 32125                       | Madagascar     | Ankazomivady     | Tenrecidae                | <i>Microgale principula</i>      | 2011 | This study | Dietrich <i>et al.</i> 2014 | Dietrich <i>et al.</i> 2014 | Dietrich <i>et al.</i> 2014 | Dietrich <i>et al.</i> 2014 | YES                                 |
| 1467      | UADBA 32101                       | Madagascar     | Ankazomivady     | Tenrecidae                | <i>Microgale cowani</i>          | 2011 | This study | Dietrich <i>et al.</i> 2014 | Dietrich <i>et al.</i> 2014 | Dietrich <i>et al.</i> 2014 | Dietrich <i>et al.</i> 2014 | YES                                 |
| 1485      | UADBA 32069                       | Madagascar     | Ankazomivady     | Nesomyiinae               | <i>Eliurus minor</i>             | 2011 | This study | Dietrich <i>et al.</i> 2014 | Dietrich <i>et al.</i> 2014 | Dietrich <i>et al.</i> 2014 | Dietrich <i>et al.</i> 2014 | YES                                 |

| Sample ID     | Museum or field collection number | Island/Country | Location      | Host family or sub-family | Host species                    | Year | icdA                       | secY                        | lipL41                      | adk                         | rrs2                        | Included in the multilocus analysis |
|---------------|-----------------------------------|----------------|---------------|---------------------------|---------------------------------|------|----------------------------|-----------------------------|-----------------------------|-----------------------------|-----------------------------|-------------------------------------|
| 1491          | UADBA 50050                       | Madagascar     | Ankazomivady  | Nesomyinae                | <i>Eliurus minor</i>            | 2011 | This study                 | Dietrich <i>et al.</i> 2014 | Dietrich <i>et al.</i> 2014 | Dietrich <i>et al.</i> 2014 | Dietrich <i>et al.</i> 2014 | YES                                 |
| 1493          | UADBA 32105                       | Madagascar     | Ankazomivady  | Nesomyinae                | <i>Eliurus minor</i>            | 2011 | This study                 | Dietrich <i>et al.</i> 2014 | Dietrich <i>et al.</i> 2014 | Dietrich <i>et al.</i> 2014 | Dietrich <i>et al.</i> 2014 | YES                                 |
| 1501          | UADBA 32086                       | Madagascar     | Ankazomivady  | Nesomyinae                | <i>Eliurus minor</i>            | 2011 | This study                 | Dietrich <i>et al.</i> 2014 | Dietrich <i>et al.</i> 2014 | Dietrich <i>et al.</i> 2014 | Dietrich <i>et al.</i> 2014 | YES                                 |
| 1572          | UADBA 50018                       | Madagascar     | Lakato        | Tenrecidae                | <i>Microgale dobsoni</i>        | 2012 | This study                 | X                           | X                           | X                           | This study                  | NO                                  |
| FMNH 229014   | FMNH 229014                       | Madagascar     | Ambohitantely | Tenrecidae                | <i>Microgale dobsoni</i>        | 2014 | This study                 | Lagadec <i>et al.</i> 2016  | Lagadec <i>et al.</i> 2016  | Lagadec <i>et al.</i> 2016  | Lagadec <i>et al.</i> 2016  | YES                                 |
| UADBA 50367   | UADBA 50367                       | Madagascar     | Ambohitantely | Tenrecidae                | <i>Microgale dobsoni</i>        | 2014 | This study                 | Lagadec <i>et al.</i> 2016  | Lagadec <i>et al.</i> 2016  | Lagadec <i>et al.</i> 2016  | Lagadec <i>et al.</i> 2016  | YES                                 |
| UADBA VS-2474 | UADBA VS-2474                     | Madagascar     | Ambohitantely | Tenrecidae                | <i>Microgale dobsoni</i>        | 2014 | This study                 | Lagadec <i>et al.</i> 2016  | Lagadec <i>et al.</i> 2016  | Lagadec <i>et al.</i> 2016  | Lagadec <i>et al.</i> 2016  | YES                                 |
| 152           | FMNH 213456                       | Mauritius      | Palma         | Molossidae                | <i>Mormopterus acetabulosus</i> | 2010 | This study                 | This study                  | This study                  | This study                  | This study                  | YES                                 |
| 160           | FMNH 213464                       | Mauritius      | Palma         | Molossidae                | <i>Mormopterus acetabulosus</i> | 2010 | This study                 | This study                  | This study                  | This study                  | This study                  | YES                                 |
| 161           | FMNH 213465                       | Mauritius      | Palma         | Molossidae                | <i>Mormopterus acetabulosus</i> | 2010 | This study                 | This study                  | This study                  | This study                  | This study                  | YES                                 |
| 162           | FMNH 213466                       | Mauritius      | Palma         | Molossidae                | <i>Mormopterus acetabulosus</i> | 2010 | This study                 | This study                  | This study                  | This study                  | This study                  | YES                                 |
| 165           | FMNH 213469                       | Mauritius      | Palma         | Molossidae                | <i>Mormopterus acetabulosus</i> | 2010 | This study                 | This study                  | This study                  | This study                  | This study                  | YES                                 |
| 183           | FMNH 213487                       | Mauritius      | Trois Bras    | Molossidae                | <i>Mormopterus acetabulosus</i> | 2010 | This study                 | This study                  | This study                  | This study                  | This study                  | YES                                 |
| 188           | FMNH 213492                       | Mauritius      | Trois Bras    | Molossidae                | <i>Mormopterus acetabulosus</i> | 2010 | This study                 | This study                  | This study                  | This study                  | This study                  | YES                                 |
| 195           | FMNH 213499                       | Mauritius      | Camp Thorel   | Molossidae                | <i>Mormopterus acetabulosus</i> | 2010 | X                          | This study                  | X                           | X                           | This study                  | NO                                  |
| MDI219        | MDI 219                           | Mayotte        | Coconi        | Muridae                   | <i>Rattus rattus</i>            | 2014 | Lagadec <i>et al.</i> 2016 | Lagadec <i>et al.</i> 2016  | Lagadec <i>et al.</i> 2016  | Lagadec <i>et al.</i> 2016  | Lagadec <i>et al.</i> 2016  | YES                                 |
| MDI222        | MDI 222                           | Mayotte        | Coconi        | Tenrecidae                | <i>Tenrec ecaudatus</i>         | 2014 | Lagadec <i>et al.</i> 2016 | Lagadec <i>et al.</i> 2016  | Lagadec <i>et al.</i> 2016  | Lagadec <i>et al.</i> 2016  | Lagadec <i>et al.</i> 2016  | YES                                 |
| MDI224        | MDI 224                           | Mayotte        | Coconi        | Tenrecidae                | <i>Tenrec ecaudatus</i>         | 2014 | Lagadec <i>et al.</i> 2016 | Lagadec <i>et al.</i> 2016  | Lagadec <i>et al.</i> 2016  | Lagadec <i>et al.</i> 2016  | Lagadec <i>et al.</i> 2016  | YES                                 |
| MDI247        | MDI 247                           | Mayotte        | Kwalé         | Muridae                   | <i>Rattus rattus</i>            | 2014 | Lagadec <i>et al.</i> 2016 | Lagadec <i>et al.</i> 2016  | Lagadec <i>et al.</i> 2016  | Lagadec <i>et al.</i> 2016  | Lagadec <i>et al.</i> 2016  | YES                                 |
| MDI250        | MDI 250                           | Mayotte        | Kwalé         | Muridae                   | <i>Rattus rattus</i>            | 2014 | Lagadec <i>et al.</i> 2016 | Lagadec <i>et al.</i> 2016  | Lagadec <i>et al.</i> 2016  | Lagadec <i>et al.</i> 2016  | Lagadec <i>et al.</i> 2016  | YES                                 |

| Sample ID | Museum or field collection number | Island/Country | Location                     | Host family or sub-family | Host species                       | Year | icdA                | secY                | lipL41              | adk                 | rrs2                | Included in the multilocus analysis |
|-----------|-----------------------------------|----------------|------------------------------|---------------------------|------------------------------------|------|---------------------|---------------------|---------------------|---------------------|---------------------|-------------------------------------|
| MDI251    | MDI 251                           | Mayotte        | Kwalé                        | Muridae                   | <i>Rattus rattus</i>               | 2014 | Lagadec et al. 2016 | Lagadec et al. 2016 | Lagadec et al. 2016 | Lagadec et al. 2016 | Lagadec et al. 2016 | YES                                 |
| MDI259    | MDI 259                           | Mayotte        | Kwalé                        | Muridae                   | <i>Rattus rattus</i>               | 2014 | Lagadec et al. 2016 | Lagadec et al. 2016 | Lagadec et al. 2016 | Lagadec et al. 2016 | Lagadec et al. 2016 | YES                                 |
| MDI260    | MDI 260                           | Mayotte        | Kwalé                        | Muridae                   | <i>Rattus rattus</i>               | 2014 | Lagadec et al. 2016 | Lagadec et al. 2016 | Lagadec et al. 2016 | Lagadec et al. 2016 | Lagadec et al. 2016 | YES                                 |
| MDI272    | MDI 272                           | Mayotte        | Tsoundzou                    | Tenrecidae                | <i>Tenrec ecaudatus</i>            | 2014 | Lagadec et al. 2016 | Lagadec et al. 2016 | Lagadec et al. 2016 | Lagadec et al. 2016 | Lagadec et al. 2016 | YES                                 |
| MDI284    | MDI 284                           | Mayotte        | Tsoundzou                    | Muridae                   | <i>Rattus rattus</i>               | 2014 | Lagadec et al. 2016 | Lagadec et al. 2016 | Lagadec et al. 2016 | Lagadec et al. 2016 | Lagadec et al. 2016 | YES                                 |
| MDI291    | MDI 291                           | Mayotte        | Tsoundzou                    | Muridae                   | <i>Rattus rattus</i>               | 2014 | Lagadec et al. 2016 | Lagadec et al. 2016 | Lagadec et al. 2016 | Lagadec et al. 2016 | Lagadec et al. 2016 | YES                                 |
| MDI294    | MDI 294                           | Mayotte        | Kwalé                        | Tenrecidae                | <i>Tenrec ecaudatus</i>            | 2014 | Lagadec et al. 2016 | Lagadec et al. 2016 | Lagadec et al. 2016 | Lagadec et al. 2016 | Lagadec et al. 2016 | YES                                 |
| MDI295    | MDI 295                           | Mayotte        | Kwalé                        | Tenrecidae                | <i>Tenrec ecaudatus</i>            | 2014 | Lagadec et al. 2016 | Lagadec et al. 2016 | Lagadec et al. 2016 | Lagadec et al. 2016 | Lagadec et al. 2016 | YES                                 |
| MDI306    | MDI 306                           | Mayotte        | Vahibe                       | Tenrecidae                | <i>Tenrec ecaudatus</i>            | 2014 | Lagadec et al. 2016 | Lagadec et al. 2016 | Lagadec et al. 2016 | Lagadec et al. 2016 | Lagadec et al. 2016 | YES                                 |
| MDI308    | MDI 308                           | Mayotte        | Vahibe                       | Tenrecidae                | <i>Tenrec ecaudatus</i>            | 2014 | Lagadec et al. 2016 | Lagadec et al. 2016 | Lagadec et al. 2016 | Lagadec et al. 2016 | Lagadec et al. 2016 | YES                                 |
| MDI321    | MDI 321                           | Mayotte        | Vahibe                       | Tenrecidae                | <i>Tenrec ecaudatus</i>            | 2014 | Lagadec et al. 2016 | Lagadec et al. 2016 | Lagadec et al. 2016 | Lagadec et al. 2016 | Lagadec et al. 2016 | YES                                 |
| 1113      | FMNH 213651                       | Mozambique     | Nampula                      | Miniopteridae             | <i>Miniopterus mossambicus</i>     | 2010 | This study          | This study          | This study          | This study          | This study          | YES                                 |
| 494       | JCH 001                           | La Réunion     | Sainte Clotilde              | Muridae                   | <i>Rattus rattus</i>               | 2011 | X                   | X                   | X                   | X                   | This study          | NO                                  |
| 1712      | GLM003                            | La Réunion     | Trois Bassins                | Muridae                   | <i>Rattus rattus</i>               | 2013 | This study          | This study          | This study          | This study          | This study          | YES                                 |
| 1714      | GLM005                            | La Réunion     | Trois Bassins                | Muridae                   | <i>Rattus rattus</i>               | 2013 | This study          | This study          | This study          | This study          | This study          | YES                                 |
| MG354     | MG 354                            | La Réunion     | Trois Bassins                | Molossidae                | <i>Mormopterus francoismoutoui</i> | 2013 | This study          | This study          | This study          | This study          | This study          | YES                                 |
| MG372     | MG 372                            | La Réunion     | Trois Bassins                | Molossidae                | <i>Mormopterus francoismoutoui</i> | 2013 | This study          | This study          | This study          | This study          | This study          | YES                                 |
| MG384     | MG 384                            | La Réunion     | Trois Bassins                | Molossidae                | <i>Mormopterus francoismoutoui</i> | 2013 | This study          | This study          | This study          | This study          | This study          | YES                                 |
| MG386     | MG 386                            | La Réunion     | Trois Bassins                | Molossidae                | <i>Mormopterus francoismoutoui</i> | 2013 | This study          | This study          | This study          | This study          | This study          | YES                                 |
| 337       | GR080                             | Seychelles     | Mahé                         | Muridae                   | <i>Rattus rattus</i>               | 2011 | This study          | This study          | This study          | This study          | This study          | YES                                 |
| YGO42     | YGO42                             | Seychelles     | Fairyland                    | Pteropodidae              | <i>Pteropus seychellensis</i>      | 2014 | X                   | X                   | X                   | X                   | This study          | NO                                  |
| 744       | TM 48522                          | South Africa   | Pafuri, Kruger National Park | Pteropodidae              | <i>Rousettus aegyptiacus</i>       | 2010 | This study          | This study          | This study          | This study          | This study          | YES                                 |

| Sample ID | Museum or field collection number | Island/Country | Location                            | Host family or sub-family | Host species                    | Year          | icdA                     | secY                     | lipL41                   | adk                      | rrs2                     | Included in the multilocus analysis |
|-----------|-----------------------------------|----------------|-------------------------------------|---------------------------|---------------------------------|---------------|--------------------------|--------------------------|--------------------------|--------------------------|--------------------------|-------------------------------------|
| 846       | TM 48630                          | South Africa   | Rocktail Bay, St. Lucia             | Vespertilionidae          | <i>Glauconycteris variegata</i> | 2010          | X                        | X                        | X                        | X                        | This study               | NO                                  |
| 927       | TM 48574                          | South Africa   | Pafuri, Kruger National Park        | Pteropodidae              | <i>Rousettus aegyptiacus</i>    | 2010          | X                        | X                        | X                        | X                        | This study               | NO                                  |
| 1019      | TM 48652                          | South Africa   | Kgaswane Nature Reserve, Rustenburg | Vespertilionidae          | <i>Scotophilus dinganii</i>     | 2010          | This study               | This study               | This study               | This study               | This study               | YES                                 |
| 1385      | UP 1385                           | South Africa   | Irene Caves, Centurion              | Miniopteridae             | <i>Miniopterus natalensis</i>   | 2011          | This study               | This study               | This study               | This study               | This study               | YES                                 |
| 1388      | UP 1388                           | South Africa   | Irene Caves, Centurion              | Miniopteridae             | <i>Miniopterus natalensis</i>   | 2011          | This study               | This study               | This study               | This study               | This study               | YES                                 |
| 1389      | UP 1389                           | South Africa   | Irene Caves, Centurion              | Miniopteridae             | <i>Miniopterus natalensis</i>   | 2011          | X                        | X                        | X                        | X                        | This study               | NO                                  |
| 1471      | UP 1471                           | South Africa   | Mahune Cave, Mafefe                 | Pteropodidae              | <i>Rousettus aegyptiacus</i>    | 2012          | X                        | X                        | X                        | X                        | This study               | NO                                  |
| 1483      | UP 1483                           | South Africa   | Mahune Cave, Mafefe                 | Pteropodidae              | <i>Rousettus aegyptiacus</i>    | 2012          | X                        | This study               | X                        | X                        | This study               | NO                                  |
| 1504      | UP 1504                           | South Africa   | Mahune Cave, Mafefe                 | Pteropodidae              | <i>Rousettus aegyptiacus</i>    | 2012          | X                        | This study               | X                        | X                        | This study               | NO                                  |
| 1541      | UP 1541                           | South Africa   | Rooiberg, Monate                    | Nycteridae                | <i>Nycteris thebaica</i>        | 2012          | This study               | This study               | This study               | This study               | This study               | YES                                 |
| 1542      | UP 1542                           | South Africa   | Rooiberg, Monate                    | Nycteridae                | <i>Nycteris thebaica</i>        | 2012          | This study               | This study               | This study               | This study               | This study               | YES                                 |
| 1564      | UP 1564                           | South Africa   | Mahune Cave, Mafefe                 | Pteropodidae              | <i>Rousettus aegyptiacus</i>    | 2012          | X                        | X                        | X                        | X                        | This study               | NO                                  |
| 1574      | UP 1574                           | South Africa   | Mahune Cave, Mafefe                 | Pteropodidae              | <i>Rousettus aegyptiacus</i>    | 2012          | X                        | This study               | X                        | X                        | This study               | NO                                  |
| 1577      | UP 1577                           | South Africa   | Mahune Cave, Mafefe                 | Pteropodidae              | <i>Rousettus aegyptiacus</i>    | 2012          | X                        | This study               | X                        | X                        | This study               | NO                                  |
| 1717      | UP 1717                           | South Africa   | Meletse, Thabazimbi                 | Miniopteridae             | <i>Miniopterus natalensis</i>   | 2013          | This study               | This study               | This study               | This study               | This study               | YES                                 |
| 1718      | UP 1718                           | South Africa   | Meletse, Thabazimbi                 | Miniopteridae             | <i>Miniopterus natalensis</i>   | 2013          | X                        | This study               | X                        | X                        | This study               | NO                                  |
| 1755      | UP 1755                           | South Africa   | Meletse, Thabazimbi                 | Miniopteridae             | <i>Miniopterus natalensis</i>   | 2013          | This study               | This study               | This study               | This study               | This study               | YES                                 |
| 1786      | UP 1786                           | South Africa   | Meletse, Thabazimbi                 | Miniopteridae             | <i>Miniopterus natalensis</i>   | 2013          | This study               | This study               | This study               | This study               | This study               | YES                                 |
| 1491.2    | UP 1491                           | South Africa   | Mahune Cave, Mafefe                 | Miniopteridae             | <i>Miniopterus natalensis</i>   | 2012          | This study               | This study               | This study               | This study               | This study               | YES                                 |
| 373       | UP 373                            | Swaziland      | Mlawula Nature Reserve              | Nycteridae                | <i>Nycteris thebaica</i>        | 2008          | X                        | This study               | X                        | X                        | X                        | NO                                  |
| 76        | 76                                | Tanzania       | not available                       | Muridae                   | <i>Mastomys</i> sp.             | not available | Nalam <i>et al.</i> 2010 | Nalam <i>et al.</i> 2010 | Nalam <i>et al.</i> 2010 | Nalam <i>et al.</i> 2010 | Nalam <i>et al.</i> 2010 | YES                                 |

| Sample ID | Museum or field collection number | Island/Country | Location      | Host family or sub-family | Host species          | Year          | icdA                     | secY                     | lipL41                   | adk                      | rrs2                     | Included in the multilocus analysis |
|-----------|-----------------------------------|----------------|---------------|---------------------------|-----------------------|---------------|--------------------------|--------------------------|--------------------------|--------------------------|--------------------------|-------------------------------------|
| 77        | 77                                | Tanzania       | not available | Soricidae                 | <i>Crocidura</i> sp.  | not available | Nalam <i>et al.</i> 2010 | Nalam <i>et al.</i> 2010 | Nalam <i>et al.</i> 2010 | Nalam <i>et al.</i> 2010 | Nalam <i>et al.</i> 2010 | YES                                 |
| 78        | 78                                | Tanzania       | not available | Muridae                   | <i>Mastomys</i> sp.   | not available | Nalam <i>et al.</i> 2010 | Nalam <i>et al.</i> 2010 | Nalam <i>et al.</i> 2010 | Nalam <i>et al.</i> 2010 | Nalam <i>et al.</i> 2010 | YES                                 |
| 79        | 79                                | Tanzania       | not available | Muridae                   | <i>Mastomys</i> sp.   | not available | Nalam <i>et al.</i> 2010 | Nalam <i>et al.</i> 2010 | Nalam <i>et al.</i> 2010 | Nalam <i>et al.</i> 2010 | Nalam <i>et al.</i> 2010 | YES                                 |
| 80        | 80                                | Tanzania       | not available | Soricidae                 | <i>Crocidura</i> sp.  | not available | Nalam <i>et al.</i> 2010 | Nalam <i>et al.</i> 2010 | Nalam <i>et al.</i> 2010 | Nalam <i>et al.</i> 2010 | Nalam <i>et al.</i> 2010 | YES                                 |
| 81        | 81                                | Tanzania       | not available | Soricidae                 | <i>Crocidura</i> sp.  | not available | Nalam <i>et al.</i> 2010 | Nalam <i>et al.</i> 2010 | Nalam <i>et al.</i> 2010 | Nalam <i>et al.</i> 2010 | Nalam <i>et al.</i> 2010 | YES                                 |
| 155       | 155                               | Tanzania       | not available | Cricetomyinae             | <i>Cricetomys</i> sp. | not available | Nalam <i>et al.</i> 2010 | Nalam <i>et al.</i> 2010 | Nalam <i>et al.</i> 2010 | Nalam <i>et al.</i> 2010 | Nalam <i>et al.</i> 2010 | YES                                 |
| 156       | 156                               | Tanzania       | not available | Cricetomyinae             | <i>Cricetomys</i> sp. | not available | Nalam <i>et al.</i> 2010 | Nalam <i>et al.</i> 2010 | Nalam <i>et al.</i> 2010 | Nalam <i>et al.</i> 2010 | Nalam <i>et al.</i> 2010 | YES                                 |
| 157       | 157                               | Tanzania       | not available | Cricetomyinae             | <i>Cricetomys</i> sp. | not available | Nalam <i>et al.</i> 2010 | Nalam <i>et al.</i> 2010 | Nalam <i>et al.</i> 2010 | Nalam <i>et al.</i> 2010 | Nalam <i>et al.</i> 2010 | YES                                 |
| 159       | 159                               | Tanzania       | not available | Cricetomyinae             | <i>Cricetomys</i> sp. | not available | Nalam <i>et al.</i> 2010 | Nalam <i>et al.</i> 2010 | Nalam <i>et al.</i> 2010 | Nalam <i>et al.</i> 2010 | Nalam <i>et al.</i> 2010 | YES                                 |
| 158       | 158                               | Tanzania       | not available | Cricetomyinae             | <i>Cricetomys</i> sp. | not available | Nalam <i>et al.</i> 2010 | Nalam <i>et al.</i> 2010 | Nalam <i>et al.</i> 2010 | Nalam <i>et al.</i> 2010 | Nalam <i>et al.</i> 2010 | YES                                 |
| 230       | 230                               | Tanzania       | not available | Muridae                   | <i>Mastomys</i> sp.   | not available | Nalam <i>et al.</i> 2010 | Nalam <i>et al.</i> 2010 | Nalam <i>et al.</i> 2010 | Nalam <i>et al.</i> 2010 | Nalam <i>et al.</i> 2010 | YES                                 |
| 231       | 231                               | Tanzania       | not available | Soricidae                 | <i>Crocidura</i> sp.  | not available | Nalam <i>et al.</i> 2010 | Nalam <i>et al.</i> 2010 | Nalam <i>et al.</i> 2010 | Nalam <i>et al.</i> 2010 | Nalam <i>et al.</i> 2010 | YES                                 |
| 232       | 232                               | Tanzania       | not available | Soricidae                 | <i>Crocidura</i> sp.  | not available | Nalam <i>et al.</i> 2010 | Nalam <i>et al.</i> 2010 | Nalam <i>et al.</i> 2010 | Nalam <i>et al.</i> 2010 | Nalam <i>et al.</i> 2010 | YES                                 |
| 233       | 233                               | Tanzania       | not available | Cricetomyinae             | <i>Cricetomys</i> sp. | not available | Nalam <i>et al.</i> 2010 | Nalam <i>et al.</i> 2010 | Nalam <i>et al.</i> 2010 | Nalam <i>et al.</i> 2010 | Nalam <i>et al.</i> 2010 | YES                                 |
| 234       | 234                               | Tanzania       | not available | Soricidae                 | <i>Crocidura</i> sp.  | not available | Nalam <i>et al.</i> 2010 | Nalam <i>et al.</i> 2010 | Nalam <i>et al.</i> 2010 | Nalam <i>et al.</i> 2010 | Nalam <i>et al.</i> 2010 | YES                                 |
| 235       | 235                               | Tanzania       | not available | Soricidae                 | <i>Crocidura</i> sp.  | not available | Nalam <i>et al.</i> 2010 | Nalam <i>et al.</i> 2010 | Nalam <i>et al.</i> 2010 | Nalam <i>et al.</i> 2010 | Nalam <i>et al.</i> 2010 | YES                                 |
| 236       | 236                               | Tanzania       | not available | Soricidae                 | <i>Crocidura</i> sp.  | not available | Nalam <i>et al.</i> 2010 | Nalam <i>et al.</i> 2010 | Nalam <i>et al.</i> 2010 | Nalam <i>et al.</i> 2010 | Nalam <i>et al.</i> 2010 | YES                                 |
| 237       | 237                               | Tanzania       | not available | Soricidae                 | <i>Crocidura</i> sp.  | not available | Nalam <i>et al.</i> 2010 | Nalam <i>et al.</i> 2010 | Nalam <i>et al.</i> 2010 | Nalam <i>et al.</i> 2010 | Nalam <i>et al.</i> 2010 | YES                                 |
| 238       | 238                               | Tanzania       | not available | Soricidae                 | <i>Crocidura</i> sp.  | not available | Nalam <i>et al.</i> 2010 | Nalam <i>et al.</i> 2010 | Nalam <i>et al.</i> 2010 | Nalam <i>et al.</i> 2010 | Nalam <i>et al.</i> 2010 | YES                                 |
| 239       | 239                               | Tanzania       | not available | Muridae                   | <i>Mastomys</i> sp.   | not available | Nalam <i>et al.</i> 2010 | Nalam <i>et al.</i> 2010 | Nalam <i>et al.</i> 2010 | Nalam <i>et al.</i> 2010 | Nalam <i>et al.</i> 2010 | YES                                 |
| 240       | 240                               | Tanzania       | not available | Soricidae                 | <i>Crocidura</i> sp.  | not available | Nalam <i>et al.</i> 2010 | Nalam <i>et al.</i> 2010 | Nalam <i>et al.</i> 2010 | Nalam <i>et al.</i> 2010 | Nalam <i>et al.</i> 2010 | YES                                 |

|       |     |          |               |               |                       |               |                          |                          |                          |                          |                          |     |
|-------|-----|----------|---------------|---------------|-----------------------|---------------|--------------------------|--------------------------|--------------------------|--------------------------|--------------------------|-----|
| 160.2 | 160 | Tanzania | not available | Cricetomyinae | <i>Cricetomys</i> sp. | not available | Nalam <i>et al.</i> 2010 | Nalam <i>et al.</i> 2010 | Nalam <i>et al.</i> 2010 | Nalam <i>et al.</i> 2010 | Nalam <i>et al.</i> 2010 | YES |
|-------|-----|----------|---------------|---------------|-----------------------|---------------|--------------------------|--------------------------|--------------------------|--------------------------|--------------------------|-----|



**Table S2. List of primers and conditions used for the amplification of the five *Leptospira* loci.** Primers previously published by Ahmed *et al.* (2006) and Dietrich *et al.* (2014) are marked with an asterisk \*<sup>1</sup> and \*<sup>2</sup>, respectively.

| Gene          | Primers                                            | Sequence (5' – 3')                                                          | T° annealing    |
|---------------|----------------------------------------------------|-----------------------------------------------------------------------------|-----------------|
| <i>rrs2</i>   | rrs2F* <sup>1</sup>                                | CATGCAAGTCAAGCGGAGTA                                                        | 58°C            |
|               | rrs2R* <sup>1</sup>                                | AGTTGAGCCCCGAGTTTTTC                                                        |                 |
|               | rrs2Fd* <sup>2</sup>                               | CATGCAAGTCRAGCGRAGTA                                                        | 54°C            |
|               | rrs2Rd* <sup>2</sup>                               | AGTTRAGCYCRCAGTTTTTC                                                        |                 |
| <i>lipL41</i> | lipL41F* <sup>1</sup>                              | TAGGAAATTGCGCAGCTACA                                                        | 58°C            |
|               | lipL41R* <sup>1</sup><br>or lipL41Rd* <sup>2</sup> | GCATCGAGAGGAATTAACATCA<br>GCATCGAGAGGRATYARCATCA                            |                 |
|               | lipL41F3* <sup>2</sup>                             | GTCGATGTAGAATATCCGGTATTC                                                    | 52°C            |
|               | lipL41R3* <sup>2</sup>                             | ACGATTTCCTTCGTAACCTTCTTG                                                    |                 |
|               | lipL41F4d* <sup>2</sup>                            | GATGTAGRATATCCRGATTC                                                        | 50°C            |
|               | lipL41R5d* <sup>2</sup>                            | GGAGAAAGTCRCCYTTGATATA                                                      |                 |
| <i>icdA</i>   | icdAF* <sup>1</sup>                                | ATCTCCGTTGCACTCTTTGC                                                        | 58°C            |
|               | icdAR* <sup>1</sup>                                | ACCATCATCATCATCGTCCA                                                        |                 |
|               | icdAF3d<br>icdAR2<br>or icdAR3d                    | TGGAYTATTATGATTTAGGCGTGGA<br>CTTTTTTGAGATCTCCGGCTTT<br>GTGTCYTTTGTMGCRACCAA | 54°C            |
|               |                                                    |                                                                             |                 |
| <i>adk</i>    | adkF* <sup>1</sup>                                 | GGGCTGAAAAGGTACACAA                                                         | 58°C            |
|               | adkR* <sup>1</sup>                                 | ACGCAAGCTCCTTTTGAATC                                                        |                 |
|               | adkFd * <sup>2</sup><br>or adkF3d* <sup>2</sup>    | GGGCTGAAAAGGYACRCAA<br>CCTCAGATTTCYACRGGMGATA                               | 56°C<br>or 58°C |
|               | adkR3d* <sup>2</sup>                               | GCCACTCTTACRCAAGCTCC                                                        |                 |
|               | adkF6d* <sup>2</sup><br>adkR5d* <sup>2</sup>       | GGYTTTCATATYCTCAGATTTC<br>CCGACGCCRTTYACTTBAGA                              | 50°C            |
|               |                                                    |                                                                             |                 |
| <i>secY</i>   | secYF* <sup>1</sup>                                | ATGCCGATCATTTTTGCTTC                                                        | 58°C            |
|               | secYR* <sup>1</sup>                                | CCGTCCTTAATTTAGACTTCTTC                                                     |                 |
|               | secYFd* <sup>2</sup>                               | ATGCCGATCATYTTYGCTTC                                                        | 52°C            |
|               | secYR3* <sup>2</sup>                               | TTCATGAAGCCTTCATAATTTCTCA                                                   |                 |
|               | secYF4* <sup>2</sup><br>secR4d* <sup>2</sup>       | GCTTCTTCCTTGATCCIGTTTC<br>TTCATRAAGCCTTCRTAATTTCTCA                         | 52°C            |
|               |                                                    |                                                                             |                 |

Amplifications were performed with 2 µl of cDNA in a 24 µl reaction mixture containing 12.5 µl of GoTaq Hot Start Green Master Mix 2X (Promega, Madison, WI), 0.5 µl (10 µM) of each primer and 10.5 µl of RNAase free water. The PCR conditions consisted of an initial denaturation step at 95°C for 5 min, followed by 45 cycles of denaturation at 94°C for 30 s, annealing between 50-58°C for 30 s, and extension at 72°C for 1 min, with a final extension at 72°C for 7 min. For the *adk* gene, we performed a second semi-nested PCR (primers adkF3d and adkR3d) for samples exhibiting weak detection signals.

**Table S3.** Details of the 47 reference strains used in the phylogenetic analyses. All these strains were used in the *secY* (Figure S1) and *rrs2* (Figure S2) phylogenies. The strains

from *L. santarosai* and *L. noguchi* were not included in the multilocus phylogeny (Figure 3), as these *Leptospira* species were not identified in our samples. In addition, four samples (denoted with an asterisk) were not included in the multilocus phylogeny, as the *icdA* gene was not available for these samples.

| Tree ID                          | Label         | Geographic origin | Host species        | Reference |
|----------------------------------|---------------|-------------------|---------------------|-----------|
| <i>Leptospira borgpetersenii</i> |               |                   |                     |           |
| Lb2                              | 208-Ref8      | Italy             | Unknown             | 3         |
| Lb6                              | 212-UK22      | Indonesia         | Unknown             | 3         |
| Lb10                             | 221-QSL91     | Kenya             | Human               | 3         |
| Lb11                             | 222-QSL104    | Bulgaria          | Human               | 3         |
| Lb12                             | 223-QSL108    | Kenya             | Human               | 3         |
| Lb15                             | 226-QSL131    | Russia            | Human               | 3         |
| Lb16                             | 227-QSL132    | Tunisia           | Pig                 | 3         |
| Lb17                             | 228-QSL134    | China             | Pig                 | 3         |
| Lb28                             | 241-R54       | Ireland           | Dog                 | 3         |
| Lb29                             | 242-R55       | Ireland           | Pygmy shrew         | 3         |
| Lb30                             | 243-R56       | Ireland           | Gemsbok             | 3         |
| Lb32                             | 246-R61       | Portugal          | <i>Mus musculus</i> | 3         |
| Lb38*                            | st. 200701204 | Mayotte           | Human               | 4         |
| <i>Leptospira mayottensis</i>    |               |                   |                     |           |
| Lm1*                             | st. 200901116 | Mayotte           | Human               | 4         |
| <i>Leptospira interrogans</i>    |               |                   |                     |           |
| Li2*                             | st. 200901482 | Mayotte           | Human               | 4         |
| Li3                              | 31-QSL27      | Philippines       | Rat                 | 3         |
| Li4                              | 42-QSL51      | Malaysia          | Rat                 | 3         |
| Li5                              | 44-QSL55      | Korea             | Mouse               | 3         |
| Li6                              | 62-R7         | Brazil            | Rat                 | 3         |
| Li7                              | 68-R17        | Brazil            | Cattle              | 3         |
| Li8                              | 69-R17        | United Kingdom    | Mouse               | 3         |
| Li9                              | 40-QSL47      | Peru              | Opossum             | 3         |
| Li10                             | 39-QSL46      | Malaysia          | Human               | 3         |
| Li11                             | 56-QSL105     | Sri Lanka         | Human               | 3         |
| Li13                             | 22-QSL3       | New Guinea        | Bandicoot           | 3         |
| Li14                             | 54-QSL95      | Australia         | Human               | 3         |
| <i>Leptospira santarosai</i>     |               |                   |                     |           |
| Ls1                              | 182-QSL93     | Trinidad          | Human               | 3         |
| Ls2                              | 184-QSL100    | Brazil            | Rat                 | 3         |
| Ls3                              | 183-QSL99     | Peru              | Opossum             | 3         |
| Ls4                              | 202-R21       | Costa Rica        | Human               | 3         |
| Ls5                              | 197-R1        | Brazil            | Opossum             | 3         |
| Ls6                              | 200-R14       | Brazil            | Capybara            | 3         |
| Ls7                              | 189-QSL117    | USA               | Opossum             | 3         |
| Ls8                              | 192-QSL121    | Panama            | Spiny Rat           | 3         |
| <i>Leptospira kirschneri</i>     |               |                   |                     |           |
| Lk1                              | 146-QSL14     | Kenya             | Rat                 | 3         |
| Lk2                              | 145-QSL12     | Russia            | Hedgehog            | 3         |
| Lk3                              | 143-QSL9      | Bulgaria          | Human               | 3         |
| Lk4                              | 152-QSL59     | Zimbabwe          | Cattle              | 3         |
| Lk5                              | 151-QSL53     | Jamaica           | Rat                 | 3         |
| Lk6                              | 150-QSL44     | Ghana             | Human               | 3         |
| Lk7                              | 162-R58       | Ireland           | Mouse               | 3         |
| Lk9*                             | st. 200801925 | Mayotte           | Human               | 4         |
| <i>Leptospira noguchi</i>        |               |                   |                     |           |
| Ln1                              | 257-QSL82     | Panama            | Opossum             | 3         |
| Ln2                              | 254-QSL20     | Argentina         | Armadillo           | 3         |

|     |           |        |        |   |
|-----|-----------|--------|--------|---|
| Ln3 | 255-QSL24 | Panama | Rat    | 3 |
| Ln4 | 256-QSL74 | USA    | Nutria | 3 |
| Ln5 | 253-QSL13 | USA    | Human  | 3 |

---

**Table S4. Results of the hierarchical AMOVA analysis.** \*  $p < 0.05$ , \*\*\*  $p < 0.001$ .

|                                                                                                | d.f. | $\Phi$ statistics         | % total variation |
|------------------------------------------------------------------------------------------------|------|---------------------------|-------------------|
| <b><i>Geographic structure (bats only)</i></b>                                                 |      |                           |                   |
| Among islands/countries (South Africa, Madagascar, Mauritius, Comoros, La Réunion)             | 4    | $\Phi_{CT} = 0.067$       | 6.69              |
| Among host species within islands/countries                                                    | 8    | $\Phi_{SC} = 0.636^*$     | 59.38             |
| Within populations                                                                             | 21   | $\Phi_{ST} = 0.661^{***}$ | 33.93             |
| <b><i>Geographic structure (terrestrial small mammals only)</i></b>                            |      |                           |                   |
| Among islands/countries (Madagascar, La Réunion, Tanzania, Mayotte)                            | 3    | $\Phi_{CT} = 0.062$       | 6.22              |
| Among host species within islands/countries                                                    | 5    | $\Phi_{SC} = 0.580^{***}$ | 54.33             |
| Within populations                                                                             | 56   | $\Phi_{ST} = 0.610^{***}$ | 39.45             |
| <b><i>Structure by host groups (bats vs. terrestrial small mammals) in Madagascar only</i></b> |      |                           |                   |
| Among host groups                                                                              | 1    | $\Phi_{CT} = -0.087$      | 8.67              |
| Among host species within host groups                                                          | 6    | $\Phi_{SC} = 0.577^{***}$ | 62.71             |
| Within populations                                                                             | 27   | $\Phi_{ST} = 0.540^{***}$ | 45.97             |

**Table S5. Haplotype diversity of *Leptospira* in the western Indian Ocean islands and neighboring Africa.** Haplotype diversity was not calculated for Mozambique, Swaziland and Seychelles, as either no sample or only one sample was available for these locations. “tsm” refer to terrestrial small mammals.

|                           | <b>adk</b> | <b>icdA</b> | <b>lipL41</b> | <b>rrs2</b> | <b>secY</b> |
|---------------------------|------------|-------------|---------------|-------------|-------------|
| <b><u>Locations</u></b>   |            |             |               |             |             |
| <b>South Africa</b>       | 0.778      | 0.533       | 0.756         | 0.733       | 0.867       |
| <b>Madagascar</b>         | 0.851      | 0.794       | 0.815         | 0.530       | 0.845       |
| <b>Mauritius</b>          | 0          | 0           | 0.905         | 0           | 0.952       |
| <b>Comoros</b>            | 1          | 1           | 1             | 1           | 1           |
| <b>La Réunion</b>         | 0.533      | 0.533       | 0.533         | 0.533       | 0.533       |
| <b>Tanzania</b>           | 0.798      | 0.897       | 0.877         | 0.826       | 0.787       |
| <b><u>Host groups</u></b> |            |             |               |             |             |
| <b>bats</b>               | 0.889      | 0.854       | 0.938         | 0.822       | 0.953       |
| <b>tsm</b>                | 0.871      | 0.863       | 0.882         | 0.693       | 0.880       |

**Figure S1. Mean posterior values obtained with BEAST for the strict clock, the uncorrelated relaxed lognormal and exponential clocks.**

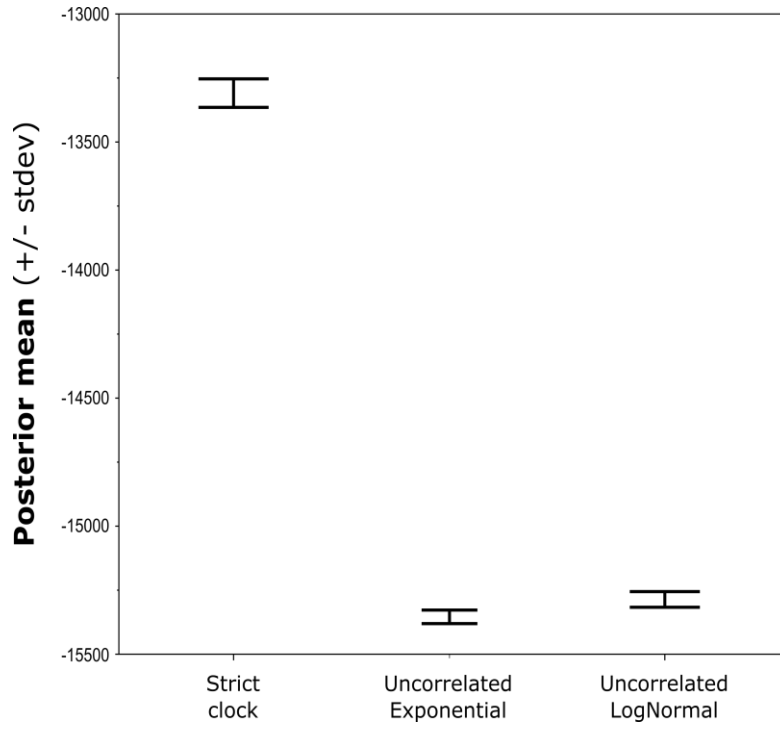

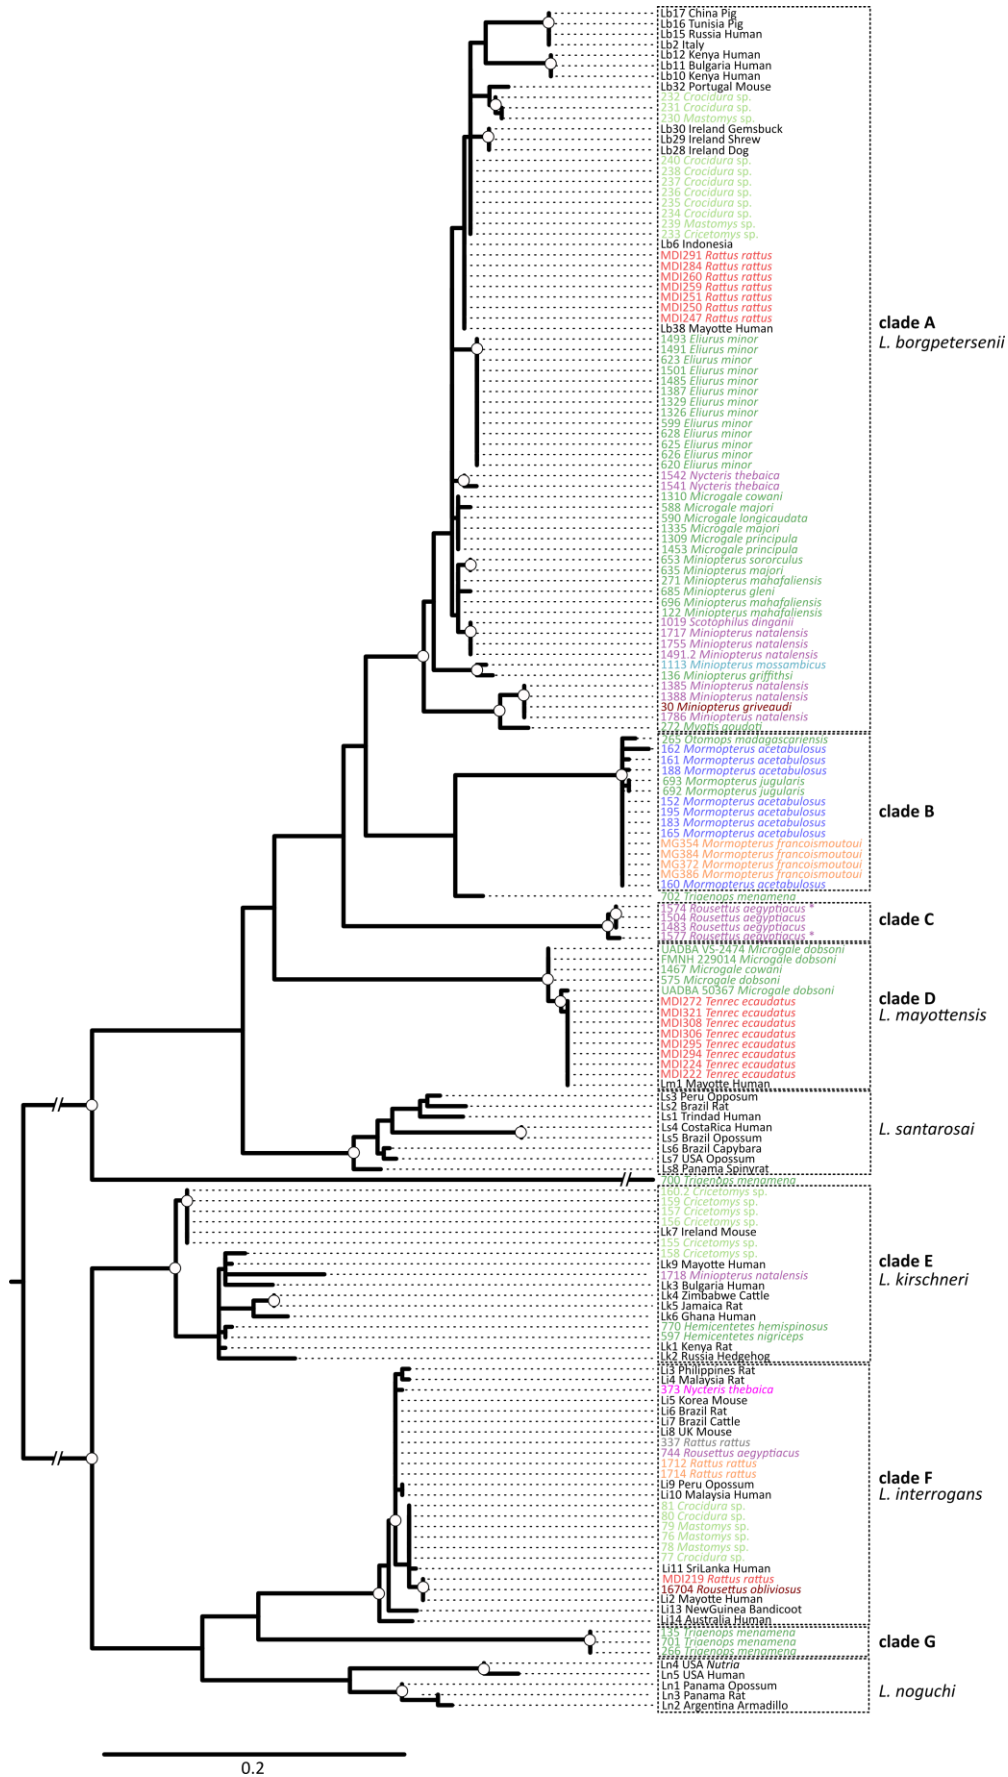

**Figure S2. Maximum likelihood phylogenetic tree based on the analysis of *secY* gene fragment.** Taxa are colored according to the location (see Figure 1). Taxa with an asterisk (\*) were suspected of co-infection. Reference sequences are indicated in black. Bootstrap values higher than 75% are represented by white circles. The boxes with dashed lines correspond to the major genetic clades. The tree was constructed with a TIM3+I+G model.



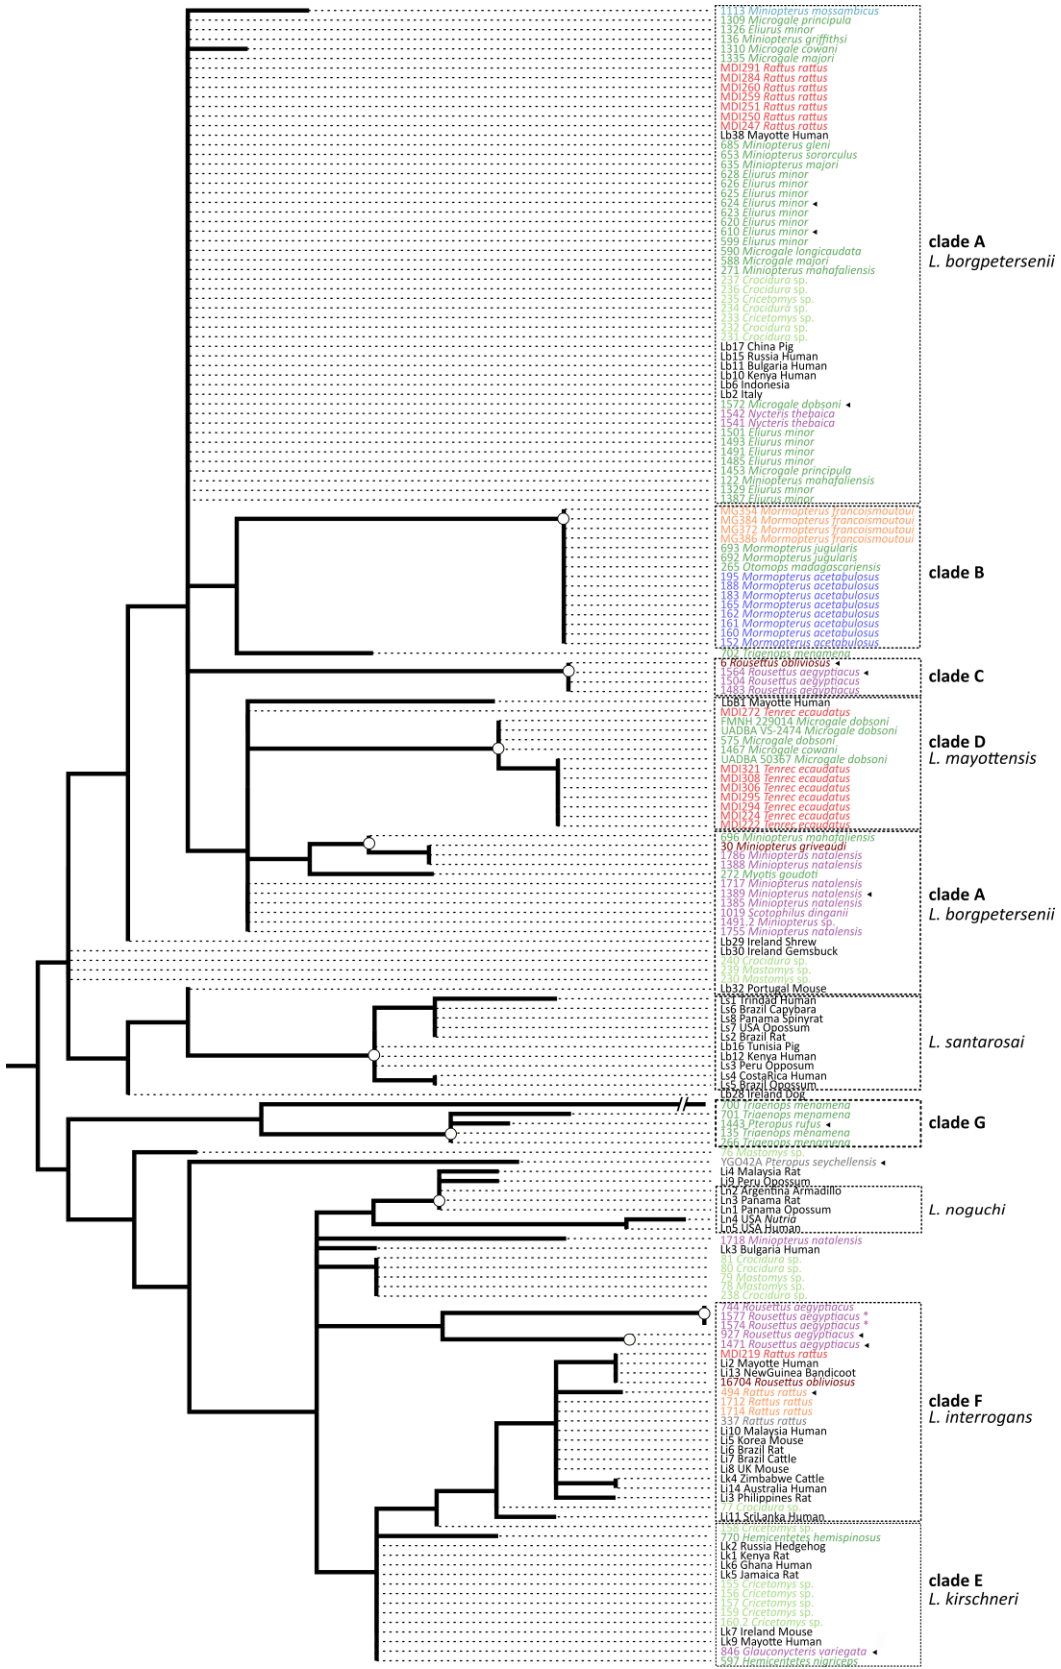

**Figure S3. Maximum likelihood phylogenetic tree based on the analysis of *rrs2* gene fragment.** Taxa are colored according to the location (see Figure 1). The 12 sequences added to the *rrs2* phylogeny, compared to the *secY* phylogeny, are denoted by a black triangle (◄). Taxa with an asterisk (\*) were suspected of co-infection. Reference sequences are indicated in black. Clades identified with the *secY* phylogeny (figure S1) are indicated on the tree. Bootstrap values higher than 75% are represented by white circles. The tree was constructed with a TIM3+I+G model.

## References

- 1 Sikes RS, The Animal Care and use C of the AS of M. 2016 Guidelines of the American Society of Mammalogists for the use of wild mammals in research and education. *J Mammal* 2016; **97**: 663–688.
- 2 Folmer O, Black M, Hoeh W, Lutz R, Vrijenhoek R. DNA primers for amplification of mitochondrial cytochrome c oxidase subunit I from diverse metazoan invertebrates. *Mol Mar Biol Biotechnol* 1994; **3**: 294–299.
- 3 Ahmed N, Devi SM, Valverde MDLÁ, Vijayachari P, Machang RS, Ellis WA *et al.* Multilocus sequence typing method for identification and genotypic classification of pathogenic *Leptospira* species. *Ann Clin Microbiol Antimicrob* 2006; **5**: 28.
- 4 Bourhy P, Collet L, Lernout T, Zinini F, Hartskeerl RA, van der Linden H *et al.* Human *Leptospira* isolates circulating in Mayotte (Indian Ocean) have unique serological and molecular features. *J Clin Microbiol* 2012; **50**: 307–11.
